# Supplementary figures and images for: The viral context instructs the redundancy of costimulatory pathways in driving CD8+ T cell expansion
Source: eLife journal article supplement (doi:10.7554/elife.07486), 2015-08-11

Figure 1 - figure supplement 1 Welten et al.

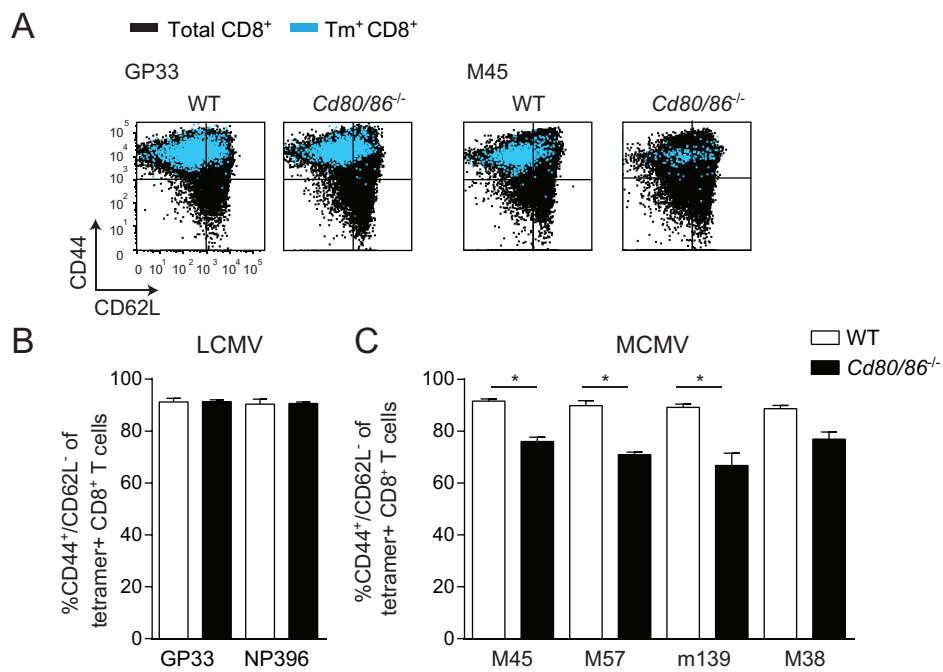

Supplement: supp [file elife_poa_e07486_Figure_1_figure_supplement_1.pdf › elife_poa_e07486_Figure_1_figure_supplement_1.pdf]

Figure 3 - figure supplement 1 Welten et al.

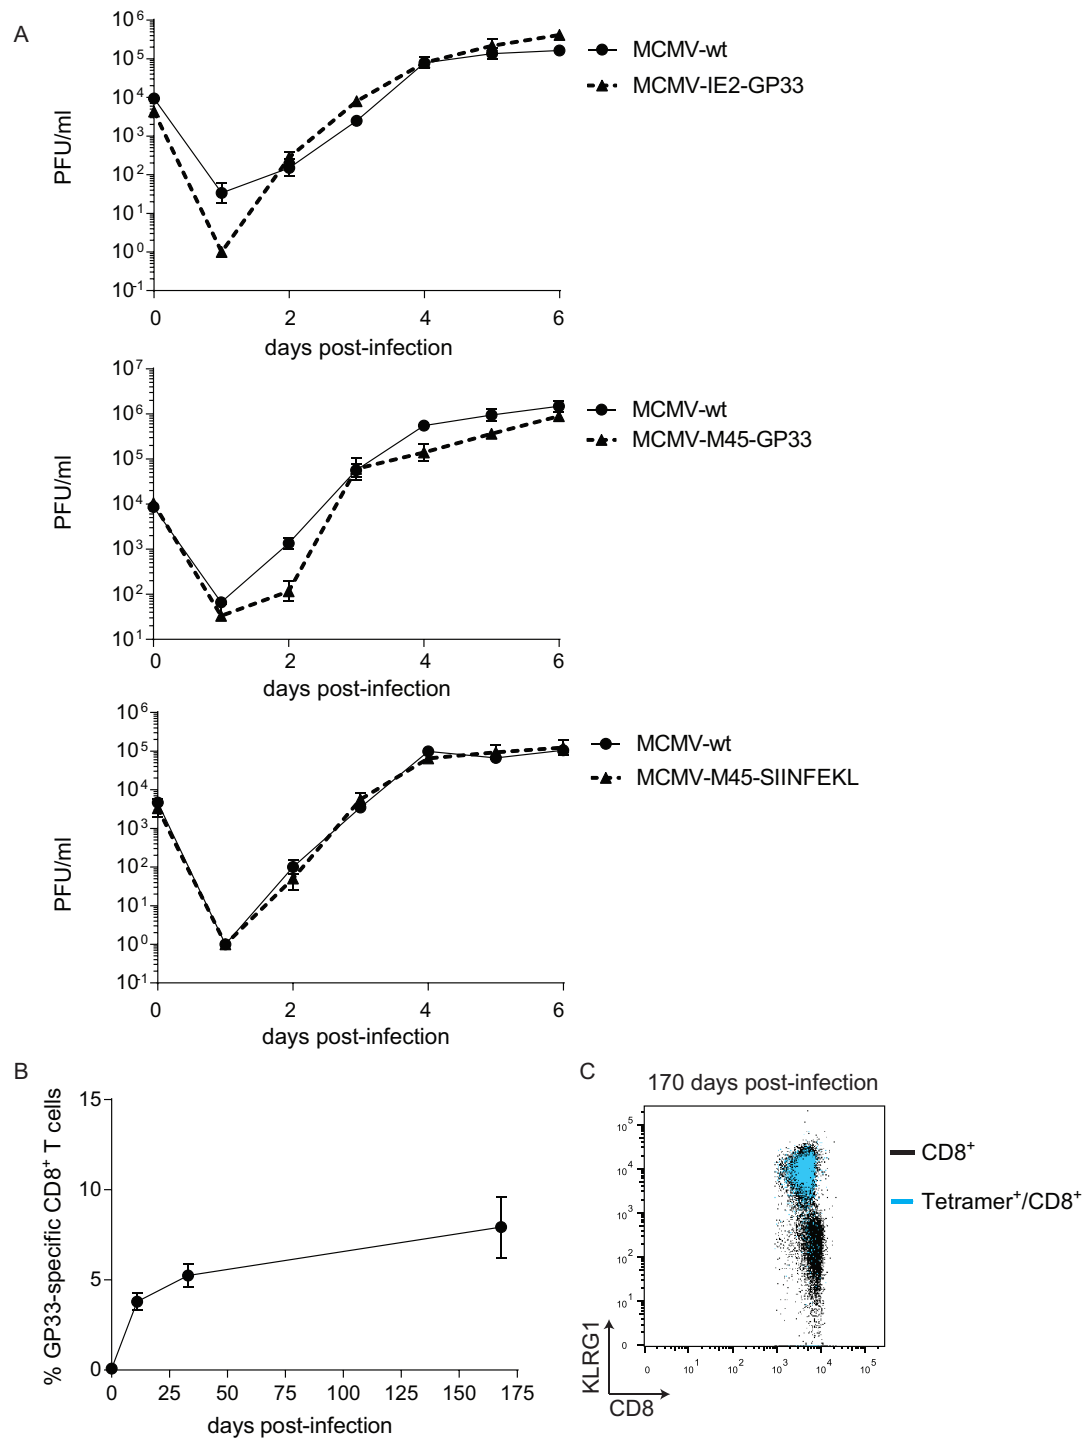

Supplement: supp [file elife_poa_e07486_Figure_3_figure_supplement_1.pdf › elife_poa_e07486_Figure_3_figure_supplement_1.pdf]

Figure 3 - figure supplement 2 Welten et al.

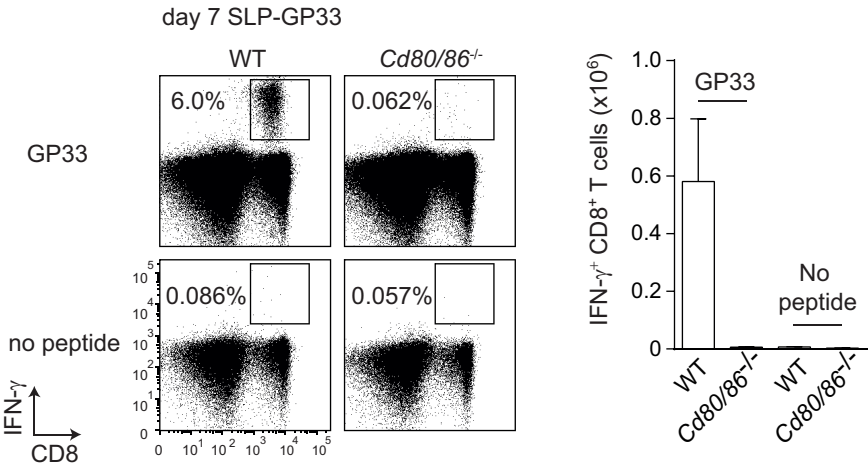

Supplement: supp [file elife_poa_e07486_Figure_3_figure_supplement_2.pdf › elife_poa_e07486_Figure_3_figure_supplement_2.pdf]

Figure 5 - figure supplement 1 Welten et al.

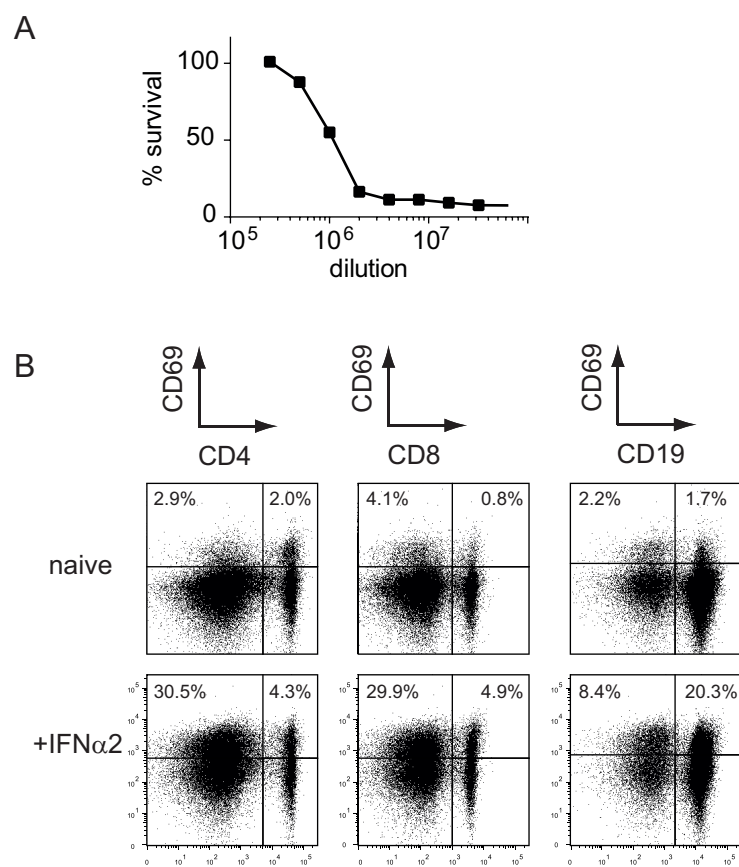

Supplement: supp [file elife_poa_e07486_Figure_5_figure_supplement_1.pdf › elife_poa_e07486_Figure_5_figure_supplement_1.pdf]

Figure 6 - figure supplement 1 Welten et al.

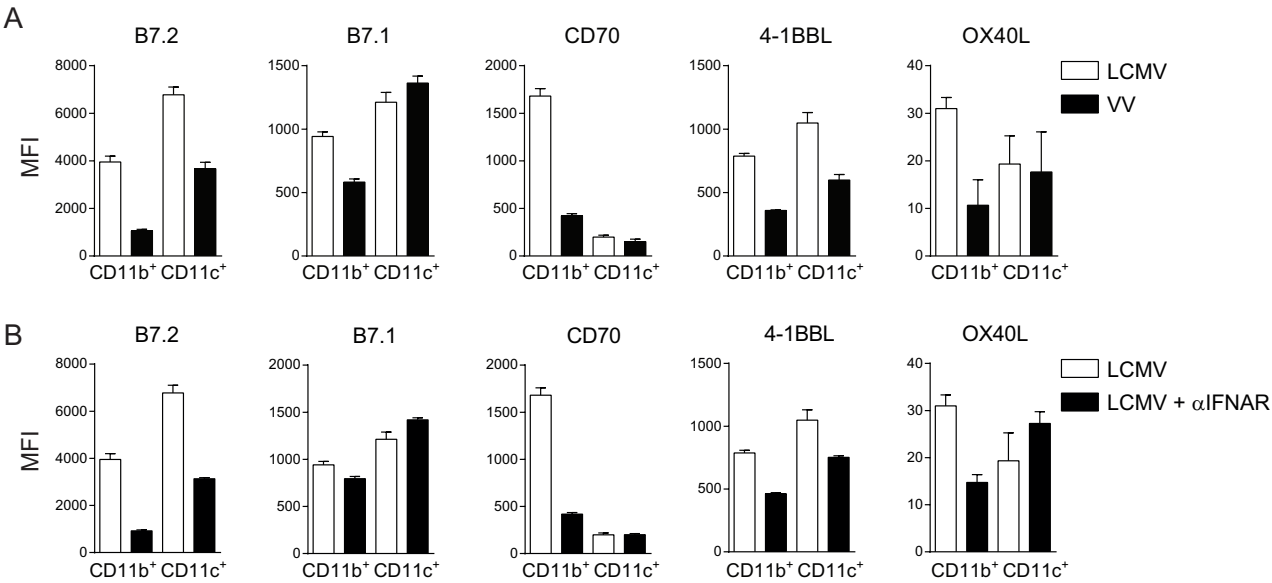

Supplement: supp [file elife_poa_e07486_Figure_6_figure_supplement_1.pdf › elife_poa_e07486_Figure_6_figure_supplement_1.pdf]

Figure 7 - figure supplement 1 Welten et al.

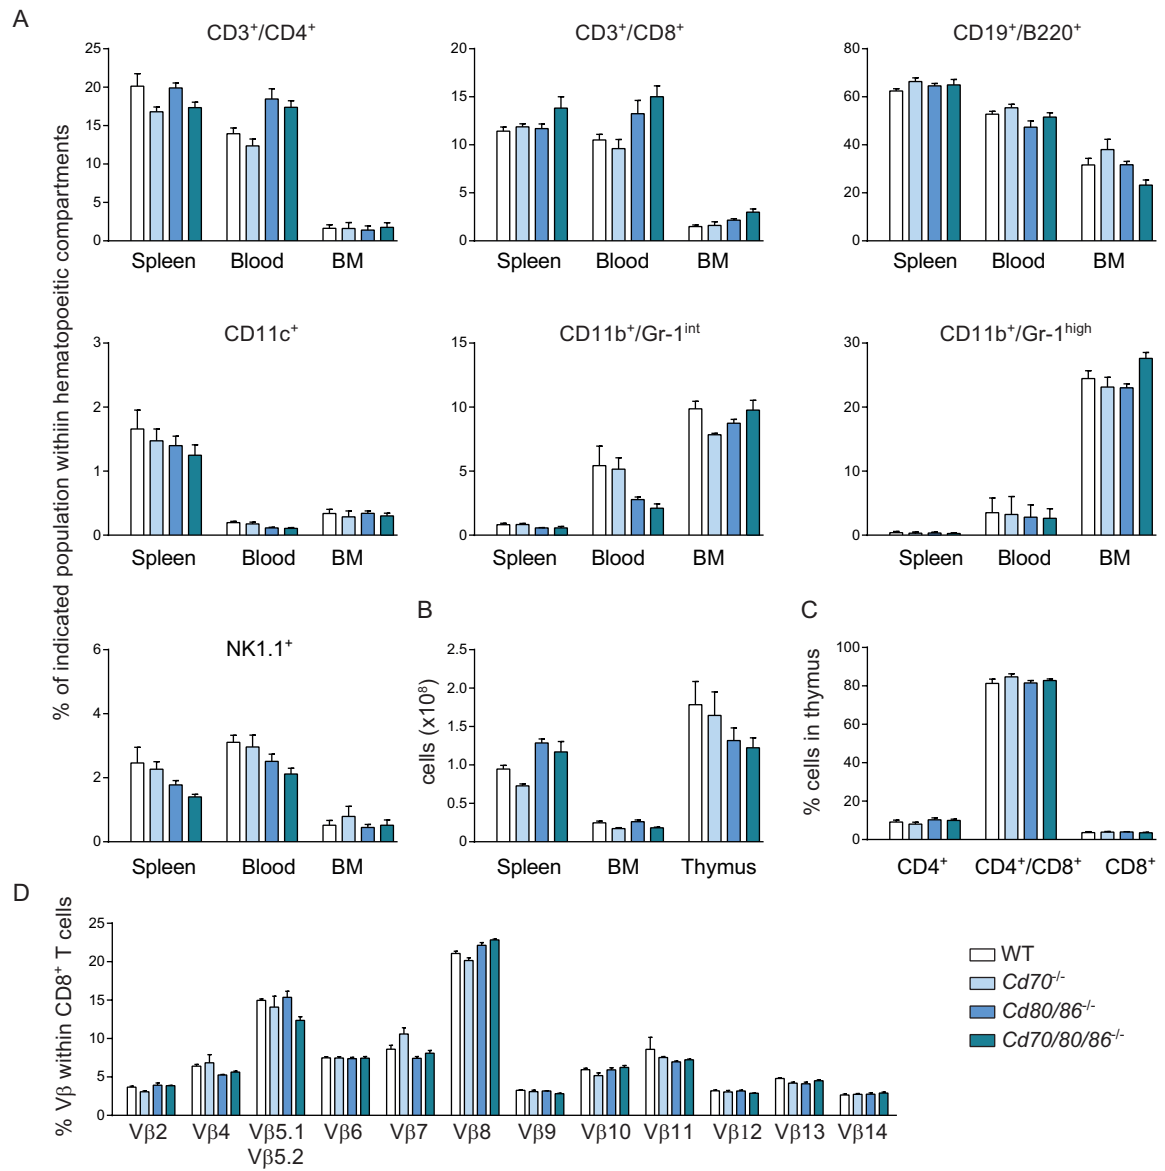

Supplement: supp [file elife_poa_e07486_Figure_7_figure_supplement_1.pdf › elife_poa_e07486_Figure_7_figure_supplement_1.pdf]

Figure 7 - figure supplement 2 Welten et al.

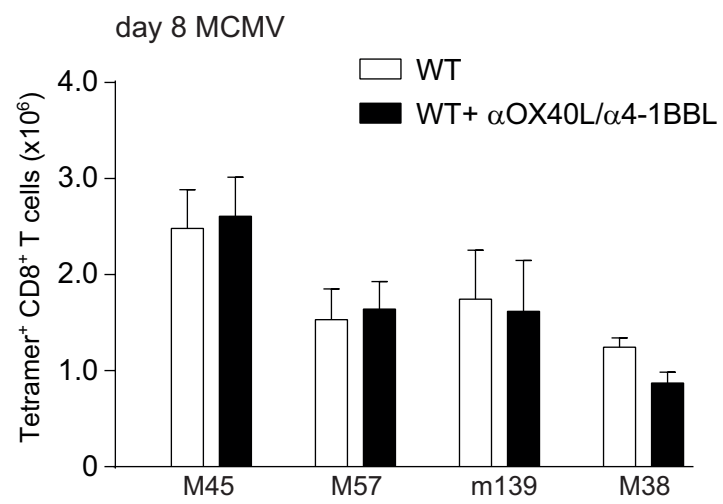

Supplement: supp [file elife_poa_e07486_Figure_7_figure_supplement_2.pdf › elife_poa_e07486_Figure_7_figure_supplement_2.pdf]
